# Supplementary material for: Tuning the light response of organic field-effect transistors using fluorographene nanosheets as an interface modification layer
Source: Royal Society of Chemistry journal article supplement (doi:10.1039/c4tc00251b), 2014-07-03
Supplement: c4tc00251b1.pdf [file c4tc00251b1.pdf]

## Supporting Information

### Tuning the light response of organic field-effect transistors using fluorographene nanosheets as interface modification layer

Liping Wang,\* Xiaodong Xie, Weifeng Zhang, Ji Zhang, Mingshan Zhu, Yunlong Guo, Penglei Chen,\* Minghua Liu, and Gui Yu\*

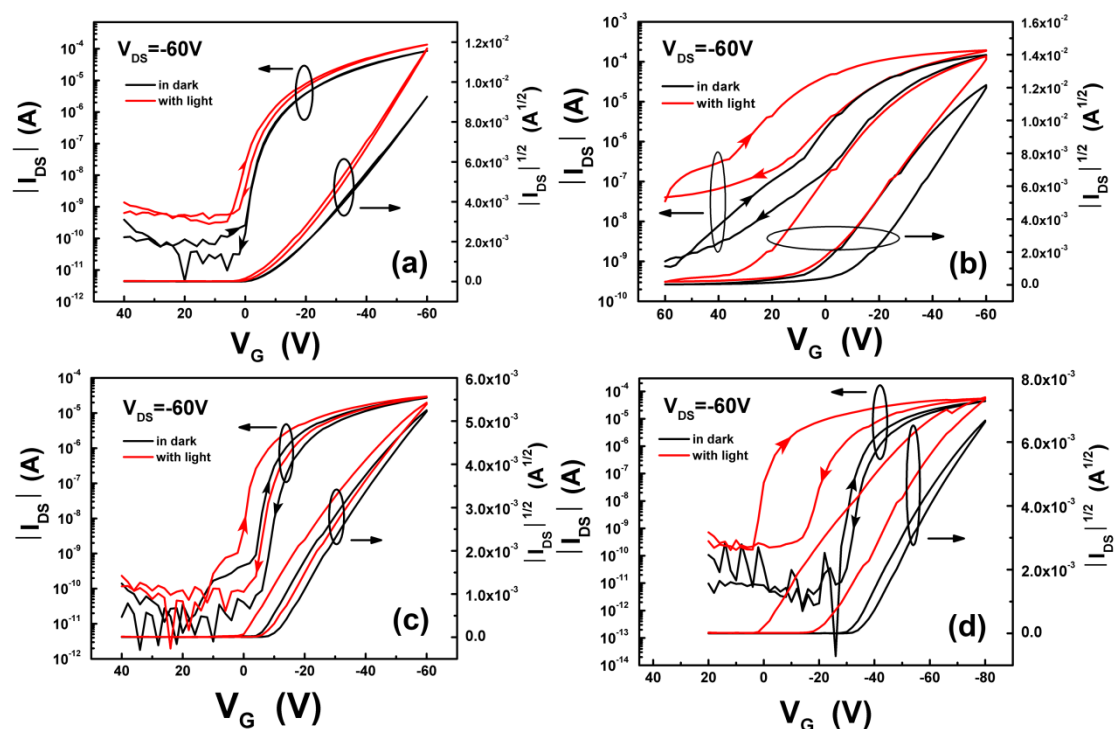

**Fig. S1** Electrical hysteresis of the OFET devices. The devices based on pentacene (a) without and (b) with FG-modified layer, devices based on TIPSEthiotet (c) without and (d) with FG-modified layer.

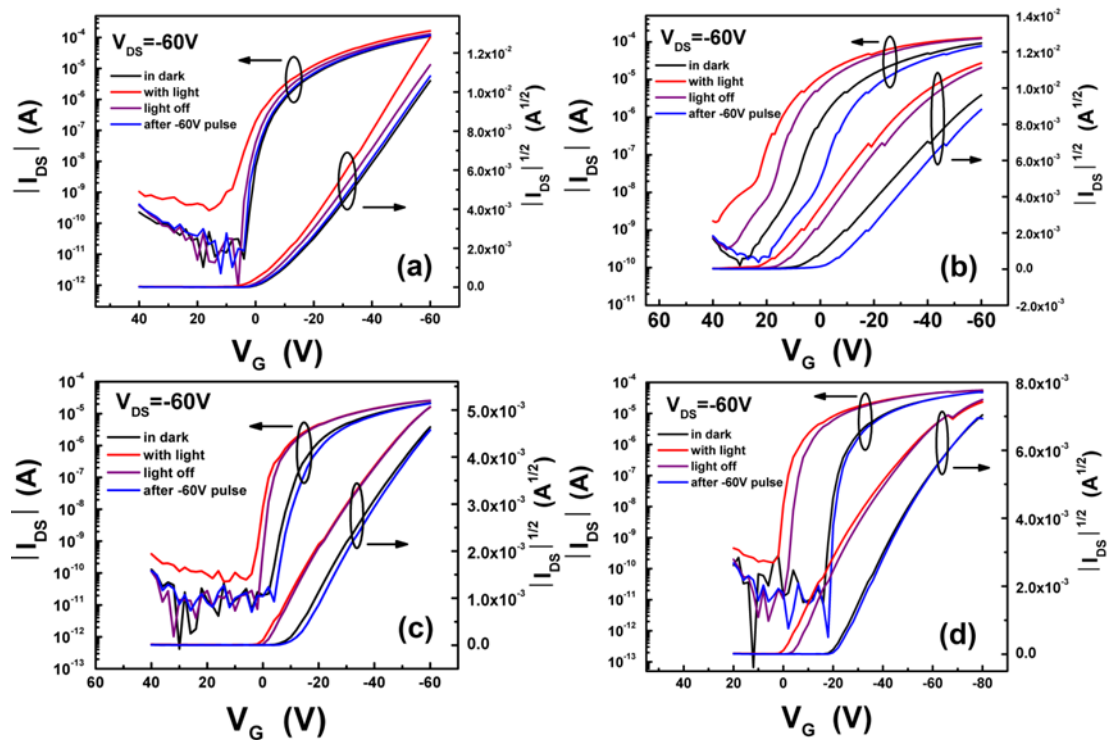

**Fig. S2** Transfer curves measured continuously of the OFET devices in dark, with light, light off, and after  $-60$  V gate pulse. The devices based on pentacene (a) without and (b) with FG-modified layer, device based on TIPSEthiote (c) without and (d) with FG-modified layer.

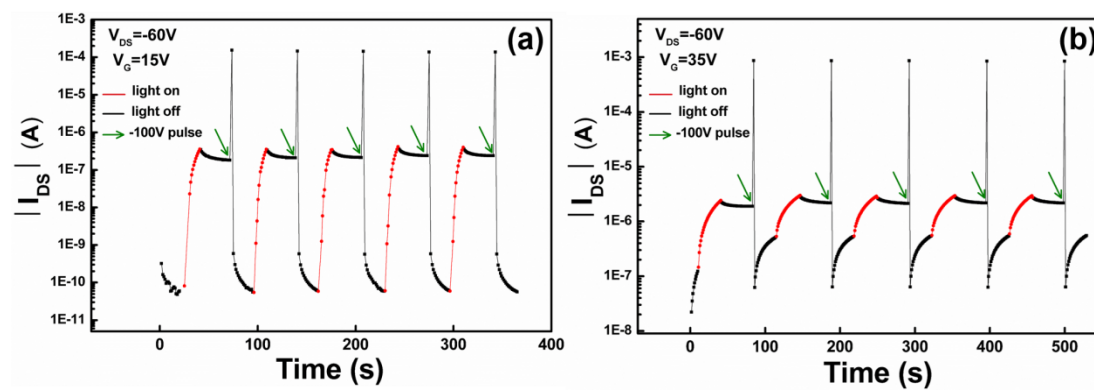

**Fig. S3** The dynamic photo-response of the FG-modified OFET devices based on (a) TIPSEthiote and (b) pentacene.
